# Supplementary material for: A Theory-Informed Pre-Implementation Enhancement Strategy Targeting Mechanisms and Outcomes of Implementation: A Triple-Blind Randomized Controlled Trial
Source: Research Square preprint supplement (doi:10.21203/rs.3.rs-1359752/v1), 2022-05-06
Supplement: Supplementary file 1 [file 9ec53231cd6395076e447c1b.docx]

# Additional File 1

## The Evidence-Based Proactive Classroom Behavioral Management (PCBM) Practices

Based on a consensus-driven approach facilitated by school administrators, staff at the school selected four evidence-based proactive classroom behavioral management (PCBM) practices as non-negotiables to implement across every classroom including (1) greeting students at the door, (2) behavior specific praise, (3) providing numerous opportunities to respond, and (4) post, teach, review, and provide feedback about positively stated behavioral expectations (PTRP).

The first strategy, *greeting students at the door*, is designed to interact positively with students as they transition into the classroom, as well as prompt desired behavior prior to outset of class activities. Research has shown this to be an effective proactive classroom management strategy (Cook et al., 2018). Second, *behavior specific praise* involves contingently and specifically acknowledging and recognizing students for exhibiting specific desired behaviors in the context of the class. This classroom management strategy has extensive empirical support (Briere et al., 2015). Third, *providing numerous opportunities to respond* is among the most widely researched classroom management strategies (Simonsen et al., 2010), and it involves actively engaging students by prompting or soliciting responses from students. Students may respond verbally, or with gestures or actions, and may do so either chorally or individually. The last strategy is post, teach, review, and provide feedback about positively stated behavioral expectations (Reinke et al., 2013). It involves creating a common language among students regarding specific behavioral expectations by teaching, cuing, and prompting students to engage in these behavioral expectations to maintain an orderly, productive, and safe learning environment.

Reference

Briere, D. E., Simonsen, B., Sugai, G., & Myers, D. (2015). Increasing new teachers’ specific praise using a within-school consultation intervention. *Journal of Positive Behavior Interventions*, *17*(1), 50-60.

Cook, C. R., Fiat, A., Larson, M., Daikos, C., Slemrod, T., Holland, E. A., ... & Renshaw, T. (2018). Positive Greetings at the Door: Evaluation of a Low-Cost, High-Yield Proactive Classroom Management Strategy. *Journal of Positive Behavior Interventions*, 1098300717753831.

Reinke, W. M., Herman, K. C., & Stormont, M. (2013). Classroom-level positive behavior supports in schools implementing SW-PBIS: Identifying areas for enhancement. *Journal of Positive Behavior Interventions*, *15*(1), 39-50.

Simonsen, B., Myers, D., & DeLuca, C. (2010). Teaching teachers to use prompts, opportunities to respond, and specific praise. *Teacher Education and Special Education*, *33*(4),
